# Supplementary material for: Hepatitis B Co-Infection Has Limited Impact on Liver Stiffness Regression in Chronic Hepatitis C Patients Treated with Direct-Acting Antivirals
Source: MDPI journal article supplement (doi:10.3390/v14040786), 2022-04-10
Supplement: s1 [file s1]

## Supplementary Material

**Table S1.** Pretherapy demographic comparison between patients with and without HBV coinfection.

| Variables                         | All (N = 906)      | Mono-HCV or B+C coinfection |                    | P value |
|-----------------------------------|--------------------|-----------------------------|--------------------|---------|
|                                   |                    | Mono-C (N = 854)            | B+C (N = 52) *     |         |
| Age (years)                       | 63.2 ± (11.73)     | 63.28 ± (11.73)             | 61.87 ± (11.74)    | 0.317   |
| Male, n (%)                       | 360 (39.735%)      | 332 (38.876%)               | 28 (53.846%)       | 0.032   |
| Genotype, n (%)                   |                    |                             |                    |         |
| Non-1                             | 328 (36.203%)      | 307 (35.948%)               | 21 (40.385%)       | 0.518   |
| 1                                 | 578 (63.797%)      | 547 (64.052%)               | 31 (59.615%)       |         |
| HCV RNA (Log <sub>10</sub> IU/ml) | 6.192 (1.98~10.63) | 6.188 (1.98~10.63)          | 6.219 (3.7~7.04)   | 0.273   |
| ≥ 6                               | 535 (59.181%)      | 505 (59.203%)               | 30 (58.824%)       | 0.957   |
| < 6                               | 369 (40.819%)      | 348 (40.797%)               | 21 (41.176%)       |         |
| BMI (kg/m <sup>2</sup> )          | 24.44(15.56~44.82) | 24.44 (15.56~44.82)         | 24.39 (16.8~32.89) | 0.479   |
| HbA1c                             | 5.7 (4.3~11.9)     | 5.7 (4.3~11.9)              | 5.75 (4.9~11.3)    | 0.621   |
| ≥ 6.5                             | 168 (19.178%)      | 157 (18.961%)               | 11 (22.917%)       | 0.499   |
| < 6.6                             | 708 (80.822%)      | 671 (81.039%)               | 37 (77.083%)       |         |
| HOMA index                        | 2.11 (0.2~84.13)   | 2.12 (0.2~84.13)            | 1.97 (0.38~58.29)  | 0.386   |
| ≥ 2.5                             | 245 (37.462%)      | 234 (37.987%)               | 11 (28.947%)       | 0.264   |
| < 2.5                             | 409 (62.538%)      | 382 (62.013%)               | 27 (71.053%)       |         |
| Cholesterol (mg/dL)               | 170.0 (81.0~283.0) | 170.0 (81.0~283.0)          | 176.0 (97.0~230.0) | 0.324   |
| ≥ 200                             | 134 (17.867%)      | 127 (17.862%)               | 7 (17.949%)        | 0.989   |
| < 200                             | 616 (82.133%)      | 584 (82.138%)               | 32 (82.051%)       |         |
| Triglyceride (mg/dL)              | 91.0 (29.0~442.0)  | 91.0 (29.0~442.0)           | 91.0 (39.0~299.0)  | 0.864   |
| ≥ 100                             | 297 (39.812%)      | 282 (39.887%)               | 15 (38.462%)       | 0.86    |
| < 100                             | 449 (60.188%)      | 425 (60.113%)               | 24 (61.538%)       |         |
| LDL (mg/dL)                       | 99.0 (31.0~400.0)  | 99.0 (31.0~400.0)           | 109.0 (36.0~152.0) | 0.315   |
| ≥ 130                             | 123 (16.757%)      | 116 (16.643%)               | 7 (18.919%)        | 0.718   |
| < 130                             | 611 (83.243%)      | 581 (83.357%)               | 30 (81.081%)       |         |
| ALT (U/L)                         | 56.5 (5.0~895.0)   | 57.0 (5.0~895.0)            | 56.0 (12.0~324.0)  | 0.514   |
| < 1xULN, n (%)                    | 262 (28.918%)      | 248 (29.04%)                | 14 (26.923%)       | 0.946   |
| 1-5x                              | 574 (63.355%)      | 540 (63.232%)               | 34 (65.385%)       |         |
| ≥ 5x                              | 70 (7.726%)        | 66 (7.728%)                 | 4 (7.692%)         |         |
| T-bil. (mg/dL)                    | 0.7 (0.2~6.0)      | 0.7 (0.2~6.0)               | 0.8 (0.2~1.7)      | 0.201   |
| Albumin (g/dL)                    | 4.27 (2.7~5.21)    | 4.26 (2.7~5.21)             | 4.325 (2.88~4.8)   | 0.202   |
| INR                               | 1.1 (0.9~3.0)      | 1.1 (0.9~3.0)               | 1.1 (0.9~1.4)      | 0.128   |
| AFP (ng/mL)                       | 4.2 (1.0~2137.3)   | 4.3 (1.0~2137.3)            | 3.45 (2.0~205.0)   | 0.127   |
| Platelet (10 <sup>3</sup> /uL)    | 165.0 (20~404)     | 164.0 (20~404)              | 179.5 (42~338)     | 0.697   |
| FIB-4 score                       | 2.74 (0.29~38.29)  | 2.765 (0.29~38.29)          | 2.37 (0.41~16.38)  | 0.393   |
| FIB4 < 1.45                       | 151 (16.667%)      | 140 (16.393%)               | 11 (21.154%)       | 0.667   |
| 1.45 ≤ FIB4 < 3.25                | 374 (41.28%)       | 354 (41.452%)               | 20 (38.462%)       |         |
| 3.25 ≤ FIB4                       | 381 (42.053%)      | 360 (42.155%)               | 21 (40.385%)       |         |
| LSM                               | 10.1 (2.8~75.0)    | 10.2 (2.8~75.0)             | 8.15 (3.6~48.0)    | 0.091   |
| LSM < 7.1                         | 296 (32.671%)      | 273 (31.967%)               | 23 (44.231%)       | 0.217   |
| 7.1 ≤ LSM < 9.5                   | 137 (15.121%)      | 128 (14.988%)               | 9 (17.308%)        |         |
| 9.5 ≤ LSM < 12.5                  | 173 (19.095%)      | 166 (19.438%)               | 7 (13.462%)        |         |
| 12.5 ≤ LSM                        | 300 (33.113%)      | 287 (33.607%)               | 13 (25.0%)         |         |
| End of treatment ALT              | 19.0 (5.0~635.0)   | 18.0 (5.0~248.0)            | 22.0 (6.0~635.0)   | 0.031   |

AFP, alpha-fetoprotein; ALT, alanine aminotransferase; AST, aspartate aminotransferase; BMI, body mass index; DAA, direct antiviral agents; FIB4, The Fibrosis-4 Index; HbA1c, glycohemoglobin; HBV, hepatitis B virus; HCV, hepatitis C virus; HOMA, Homeostatic Model Assessment for Insulin Resistance; INR, international normalized ratio; LDL: low-density lipoprotein; LSM: liver stiffness measurement; T-bil.: total bilirubin; ULN, upper limit of normal; x, times. \*HBeAg status is available in 37/52 patients in coinfection group; all 37 patients were HBeAg negative.

**Table S2.** Liver stiffness measurements change in Mono HCV and HBV/HCV-co-infection.

| Subgroups                    | Liver stiffness measurements (Kpa) |                  | P value |
|------------------------------|------------------------------------|------------------|---------|
|                              | Pre-treatment                      | Post-treatment   |         |
| All patients (N = 906)       | 10.15 (2.8–75.0)                   | 6.9 (2.6–75.0)   | <0.001  |
| HCV mono-infection (N = 854) | 10.2 (2.8–75.0)                    | 6.9 (2.6–75.0)   | <0.001  |
| LSM < 7.1 (N = 273)          | 5.3 (2.8–7.0)                      | 4.6 (2.6–11.7)   | <0.001  |
| 7.1 ≤ LSM < 9.5 (N = 128)    | 8.0 (7.1–9.4)                      | 6.1 (3.8–36.3)   | <0.001  |
| 9.5 ≤ LSM < 12.5 (N = 166)   | 10.8 (9.5–12.4)                    | 7.6 (3.5–21.1)   | <0.001  |
| 12.5 ≤ LSM (N = 287)         | 22.1 (12.5–75.0)                   | 16.0 (4.9–75.0)  | <0.001  |
| HBV co-infection (N = 52)    | 8.3 (3.6–48.0)                     | 6.3 (3.3–46.4)   | <0.001  |
| LSM < 7.1 (N = 23)           | 5.4 (3.6–7.0)                      | 4.8 (3.3–7.9)    | 0.211   |
| 7.1 ≤ LSM < 9.5 (N = 9)      | 8.7 (7.7–9.1)                      | 6.9 (3.3–11.6)   | 0.164   |
| 9.5 ≤ LSM < 12.5 (N = 7)     | 11.1 (10.1–12.0)                   | 9.1 (6.5–14.3)   | 0.219   |
| 12.5 ≤ LSM (N = 13)          | 17.75 (13.3–48.0)                  | 13.05 (4.9–46.4) | 0.002   |

HBV, hepatitis B virus; HCV, hepatitis C virus; LSM, liver stiffness measurement.

**Table S3.** Demographic features before start of DAA therapy between HBV/HCV coinfectd patients with pre-DAA viremia ≥ 2000 vs. < 2000 IU/mL.

| Variables                         | HBV infection status |                           |                          | P value |
|-----------------------------------|----------------------|---------------------------|--------------------------|---------|
|                                   | Mono-C (N = 156)     | DNA < 2000 IU/mL (N = 42) | DNA ≥ 2000 IU/mL (N = 7) |         |
| HBV DNA (IU/ml)                   |                      | 27.0 (0.0–1160.0)         | 11492.0 (2525.0–61551.0) |         |
| Age (years)                       | 62.85 (31.6–91.9)    | 62.35 (26.4–84.4)         | 61.8 (48.2–80.0)         | 0.716   |
| Male, n (%)                       | 84 (53.846%)         | 21 (50.0%)                | 5 (71.429%)              | 0.572   |
| Cirrhosis by echo                 | 40 (25.641%)         | 12 (28.571%)              | 1 (14.286%)              | 0.721   |
| Genotype, n (%)                   |                      |                           |                          | 0.220   |
| Non-1                             | 46 (29.487%)         | 18 (42.857%)              | 3 (42.857%)              |         |
| 1                                 | 110 (70.513%)        | 24 (57.143%)              | 4 (57.143%)              |         |
| HCV RNA (Log <sub>10</sub> IU/ml) | 6.21 (3.23–7.29)     | 6.22 (3.70–7.04)          | 6.25 (5.11–6.78)         | 0.713   |
| BMI (kg/m <sup>2</sup> )          | 24.47 (17.07–37.50)  | 24.39 (16.80–31.11)       | 22.78 (18.83–32.89)      | 0.665   |
| HbA1c                             | 5.7 (4.6–11.9)       | 5.7 (4.9–11.3)            | 5.8 (5.2–9.9)            | 0.933   |
| HOMA index                        | 2.16 (0.48–19.71)    | 1.925 (0.38–58.29)        | 1.98 (0.88–7.34)         | 0.44    |
| Cholesterol (mg/dL)               | 166.0 (115.0–283.0)  | 170.0 (97.0–230.0)        | 198.0 (173.0–215.0)      | 0.092   |
| Triglyceride (mg/dL)              | 94.0 (34.0–275.0)    | 92.0 (47.0–299.0)         | 89.0 (39.0–206.0)        | 0.496   |
| LDL (mg/dL)                       | 102.0 (47.0–191.0)   | 102.0 (36.0–152.0)        | 120.0 (100.0–143.0)      | 0.159   |
| ALT (U/L)                         | 47.0 (8.0–273.0)     | 56.0 (15.0–324.0)         | 42.0 (14.0–263.0)        | 0.722   |
| Post Treatment ALT (U/L)          | 18.0 (6.0–173.0)     | 21.5 (6.0–635.0)          | 29.0 (11.0–79.0)         | 0.081   |
| T-bil. (mg/dL)                    | 0.7 (0.2–3.4)        | 0.7 (0.2–1.7)             | 0.9 (0.8–1.4)            | 0.082   |
| Albumin (g/dL)                    | 4.28 (3.39–5.15)     | 4.335 (3.54–4.8)          | 4.34 (4.06–4.7)          | 0.525   |
| INR                               | 1.1 (0.9–1.6)        | 1.1 (0.9–1.4)             | 1.1 (1.0–1.3)            | 0.158   |
| AFP (ng/mL)                       | 3.65 (1.0–248.1)     | 3.45 (2.0–205.0)          | 2.6 (2.2–5.6)            | 0.369   |
| Platelet (10 <sup>3</sup> /uL)    | 178.0 (29.0–384.0)   | 165.5 (42.0–338.0)        | 199.0 (189.0–244.0)      | 0.035   |
| FIB-4 score                       | 2.34 (0.29–20.18)    | 2.445 (0.41–16.38)        | 2.14 (1.07–3.61)         | 0.391   |
| LSM                               | 7.7 (3.4–52.3)       | 8.15 (3.6–48.0)           | 5.8 (3.7–17.3)           | 0.726   |
| LSM change                        | −1.65 (−26.4–11.6)   | −0.8 (−30.9–2.5)          | −0.6 (−3.6–3.8)          | 0.234   |
| Post treatment LSM                | 5.9 (2.8–63.9)       | 6.2 (3.3–46.4)            | 5.8 (3.5–14.3)           | 0.963   |

AFP, alpha-fetoprotein; ALT, alanine aminotransferase; AST, aspartate aminotransferase; BMI, body mass index; DAA, direct antiviral agents; FIB4: The Fibrosis-4 Index; HbA1c, glycohemoglobin; HBV, hepatitis B virus; HCV, hepatitis C virus; HOMA, Homeostatic Model Assessment for Insulin Resistance; INR, international normalized ratio; LDL: low-density lipoprotein; LSM: liver stiffness measurement; T-bil.: total bilirubin; ULN, upper limit of normal; x, times.

**Table S4.** Post treatment demographic comparison after PSM (1:3 match, n = 208).

| Variables              | All (N = 208)      | Mono HCV or B+C coinfection |                    | P value |
|------------------------|--------------------|-----------------------------|--------------------|---------|
|                        |                    | Mono-C (N = 156, 75%)       | B+C (N = 52, 25%)  |         |
| Post treat FIB-4 score | 2.185 (0.41–15.57) | 2.235 (0.49–15.57)          | 2.1 (0.41–6.28)    | 0.712   |
| FIB4 < 1.45            | 2.19 (0.41–15.6)   | 2.21 (0.49–15.6)            | 2.11 (0.41–6.28)   | 0.622   |
| 1.45 ≤ FIB4 < 3.25     | 42 (21.212%)       | 32 (21.477%)                | 10 (20.408%)       | 0.226   |
| 3.25 ≤ FIB4            | 109 (55.051%)      | 86 (57.718%)                | 23 (46.939%)       |         |
| FIB4 change            | −0.13 (−9.74–3.25) | −0.07 (−6.22–3.25)          | −0.28 (−9.74–1.39) | 0.109   |

|                  |                |                |                |       |
|------------------|----------------|----------------|----------------|-------|
| Post treat LSM   | 6.0 (2.8~63.9) | 5.9 (2.8~63.9) | 6.2 (3.3~46.4) | 0.763 |
| LSM < 7.1        | 127 (61.058%)  | 98 (62.821%)   | 29 (55.769%)   | 0.520 |
| 7.1 ≤ LSM < 9.5  | 25 (12.019%)   | 19 (12.179%)   | 6 (11.538%)    |       |
| 9.5 ≤ LSM < 12.5 | 21 (10.096%)   | 13 (8.333%)    | 8 (15.385%)    |       |
| 12.5 ≤ LSM       | 35 (16.827%)   | 26 (16.667%)   | 9 (17.308%)    |       |

ALT, alanine aminotransferase; HBV, hepatitis B virus; HCV, hepatitis C virus; LSM, liver stiffness measurement;.

**Table S5.** Patients received NUC during DAAs.

| Ca | Ag | Gen-der | Pre-DAA profile |                                   |                 |    |           | Hepatitis flare event |           |         |      |                      | Post DAA   |           |           | Out-come          |
|----|----|---------|-----------------|-----------------------------------|-----------------|----|-----------|-----------------------|-----------|---------|------|----------------------|------------|-----------|-----------|-------------------|
|    |    |         | HCV GT          | HCV RNA (Log <sub>10</sub> IU/ml) | HBV DNA (IU/ml) | LC | ALT (U/L) | FIB-4                 | LSM (kPa) | on-set# | NUCs | HBV DNA (IU/ml)      | ALT* (U/L) | LSM (kPa) | ALT (U/L) |                   |
| #1 | 52 | M       | 1a              | 6.5                               | 894             | No | 46        | 0.96                  | 7         | Wk 8    | ETV  | 2.88*10 <sup>9</sup> | 1584       | 7.9       | 635       | Re-covery in 3mos |
| #2 | 48 | M       | 1b              | 6.36                              | 58406           | No | 14        | 1.07                  | 5.8       | Wk 6    | ETV  | 2.61*10 <sup>6</sup> | 945        | 5.8       | 36        | Re-covery in 1mos |

ETV: entecavir; GT: genotype; HBV, hepatitis B virus; HCC, hepatic cellular carcinoma HCV, hepatitis C virus; LC: cirrhosisLSM, liver stiffness measurement; M: Male; mos: months; Nuc: nucleos(t)ide analogue; Wk: week; \*: peak level; #: counted from start of DAA treatment.

**Table S6.** Patients develop hepatic decompensation after SVR.

| Case | Age | Gender | Pre-DAA profile |                                   |                 |     |           |       |           | Post DAA  | Decompensation event |                        | Outcome                           |
|------|-----|--------|-----------------|-----------------------------------|-----------------|-----|-----------|-------|-----------|-----------|----------------------|------------------------|-----------------------------------|
|      |     |        | HCV GT          | HCV RNA (Log <sub>10</sub> IU/ml) | HBV DNA (IU/ml) | LC  | ALT (U/L) | FIB-4 | LSM (kPa) | LSM (kPa) | onset                | events                 |                                   |
| #1   | 60  | F      | 1b              | 6.36                              | Undetectable    | Yes | 102       | 8.02  | 48        | 36.3      | 3 years after EOT    | New esophageal varices | Stable after endoscopic treatment |
| #2   | 73  | M      | 1b              | 4.62                              | Undetectable    | Yes | 80        | 16.38 | 17.6      | 11.8      | 6 months after EOT   | New esophageal varices | Stable after endoscopic treatment |
| #3   | 47  | F      | 1b              | 5.47                              | 160             | Yes | 38        | 4.33  | 28.4      | 10.8      | 3.5 years after EOT  | Liver failure          | Expired                           |

EOT: end of treat; ETV: entecavir; GT: genotype; HBV, hepatitis B virus; HCC, hepatic cellular carcinoma HCV, hepatitis C virus; LC: cirrhosisLSM, liver stiffness measurement; M: Male; mos: months; Nuc: nucleos(t)ide analogue; Wk: week; \*: peak level; #: counted from start of DAA treatment.

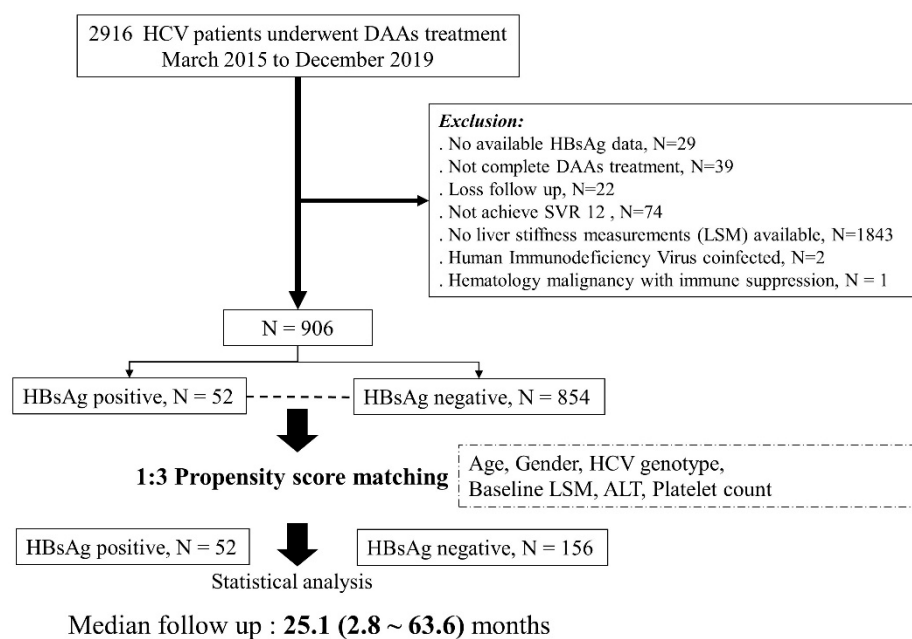

**Figure S1.** Flowchart of patient enrolment.
